# Supplementary material for: Reducing the harms of unsafe abortion: a systematic review of the safety, effectiveness and acceptability of harm reduction counselling for pregnant persons seeking induced abortion
Source: PubMed Central journal article supplement — BMJ Sex Reprod Health. 2022 Jan 11;48(2):137–45. doi: 10.1136/bmjsrh-2021-201389 (PMC9016246; doi:10.1136/bmjsrh-2021-201389), 2022-01-11
Supplement: bmjsrh-2021-201389supp001.pdf [file bmjsrh-2021-201389supp001.pdf]

Supplemental File 1. Search Strategies for “Harm Reduction To Reduce the Harms of Unsafe Abortion: a systematic review”

**PubMed**

"abortion, induced"[MeSH Major Topic] OR "abortion, spontaneous"[MeSH Major Topic] OR "abortion, incomplete"[MeSH Major Topic] OR "pregnancy termination"[Text Word] OR "menstrual regulation"[Text Word] OR "abort\*"[Text Word] OR "dilatation and curettage"[MeSH Major Topic] OR "misoprostol"[MeSH Major Topic] OR "mifepristone"[MeSH Major Topic] OR "medical abortion"[Text Word] OR "surgical abortion"[Text Word] AND (harm reduction[Mesh] OR harm reduction[tw] OR 'harm reduction' [Title/Abstract])

**EMBASE**

'abortion'/exp OR abortion\*:ti,ab OR miscarriage\*:ti,ab OR 'menstrual regulation':ti,ab OR 'induced abortion'/exp OR 'termination of pregnancy':ti,ab OR 'termination of pregnancies':ti,ab OR 'pregnancy termination':ti,ab OR 'pregnancy terminations':ti,ab OR 'post abortion':ti,ab OR 'post abortions':ti,ab OR postabortion\*:ti,ab OR 'misoprostol'/exp OR 'mifepristone'/exp OR 'medical abortion':ti,ab  
AND  
'harm reduction'/exp OR 'harm reduction' OR harm NEAR/3 reduct\*

**Cochrane Library**

abort\* and 'harm reduction'

**Global Index Medicus**

Abort\* AND 'harm reduct\*'
